1 **Article**

2

3 **Native Metabolomics Identifies the Rivulariapeptolide Family**  
4 **of Protease Inhibitors**

5

6 Raphael Reher<sup>1,3</sup>, Allegra T Aron<sup>2</sup>, Pavla Fajtová<sup>2</sup>, Paolo Stincone<sup>7</sup>, Chenxi Liu<sup>2</sup>, Ido Y  
7 Ben Shalom<sup>2</sup>, Wout Bittremieux<sup>2</sup>, Mingxun Wang<sup>2</sup>, Marie L Matos-Hernandez<sup>4</sup>, Kelsey L  
8 Alexander<sup>1,6</sup>, Eduardo J Caro-Diaz<sup>4</sup>, C Benjamin Naman<sup>5</sup>, Chambers C. Hughes<sup>7,8,9</sup>,  
9 Pieter C Dorrestein<sup>2</sup>, Anthony J O'Donoghue<sup>2</sup>, William H Gerwick<sup>1,2,#</sup> & Daniel  
10 Petras<sup>1,2,7,#</sup>

11

12 <sup>1</sup> Scripps Institution of Oceanography, University of California San Diego, USA

13 <sup>2</sup> Skaggs School of Pharmacy and Pharmaceutical Science, University of California San  
14 Diego, USA

15 <sup>3</sup> Institute of Pharmacy, Martin-Luther-University Halle-Wittenberg, Halle (Saale),  
16 Germany.

17 <sup>4</sup> Department of Pharmaceutical Sciences, School of Pharmacy, University of Puerto  
18 Rico - Medical Sciences Campus, San Juan, Puerto Rico

19 <sup>5</sup> Li Dak Sum Yip Yio Chin Kenneth Li Marine Biopharmaceutical Research Center,  
20 Department of Marine Pharmacy, College of Food and Pharmaceutical Sciences,  
21 Ningbo University 315832, Ningbo, China

22 <sup>6</sup> Department of Chemistry and Biochemistry, University of California San Diego, USA

23 <sup>7</sup> CMFI Cluster of Excellence, Interfaculty Institute of Microbiology and Infection  
24 Medicine, University of Tuebingen, Germany

25 <sup>8</sup> Department of Microbial Bioactive Compounds, Interfaculty Institute for  
26 Microbiology and Infection Medicine, University of Tuebingen, Germany

27 <sup>9</sup> German Center for Infection Research, Partner Site Tuebingen, Germany

28

29 # Correspondence: [daniel.petras@uni-tuebingen.de](mailto:daniel.petras@uni-tuebingen.de) (native metabolomics and MS-  
30 based structure elucidation), [wgerwick@health.ucsd.edu](mailto:wgerwick@health.ucsd.edu) (sampling and NMR-based  
31 structure elucidation)

32

## 33 **Abstract**

34 The identity and biological activity of most metabolites still remain unknown. A key  
35 bottleneck in the full exploration of this tremendous source of new structures and  
36 pharmaceutical activities is the compound purification needed for bioactivity assignments  
37 of individual compounds and downstream structure elucidation. To enable bioactivity-  
38 focused compound identification from complex mixtures, we developed a scalable native  
39 metabolomics approach that integrates non-targeted liquid chromatography tandem  
40 mass spectrometry, and simultaneous detection of protein binding via native mass  
41 spectrometry. While screening for new protease inhibitors from an environmental  
42 cyanobacteria community, native metabolomics revealed 30 cyclodepsipeptides as  
43 chymotrypsin binders. Mass spectrometry-guided purification then allowed for the full  
44 structure elucidation of four new specialized metabolites via tandem mass spectrometry,  
45 chemical derivatization, and nuclear magnetic resonance spectroscopy. Together with  
46 the evaluation of biological activities, our results identified the rivulariapeptolides as a  
47 family of serine protease inhibitors with nanomolar potency, highlighting native  
48 metabolomics as promising approach for drug discovery, chemical ecology, and chemical  
49 biology studies.

50

51

## 52 **Main**

53 Specialized metabolites, often referred to as natural products, are a tremendous pool of  
54 chemically diverse and pharmaceutically active organic compounds. By some estimates  
55 more than 50% of all current pharmaceuticals are based on or inspired by natural  
56 products<sup>1</sup>. Nevertheless, the vast majority of biological activities and pharmaceutical  
57 potential of specialized metabolites, as well as their ecological functions, still remain to  
58 be discovered<sup>2</sup>.

59 While mining genome and meta-genome data has begun to provide an overview of the  
60 biosynthetic potential of nature<sup>3,4</sup>, most specialized metabolites remain inaccessible, as  
61 the living organism that produces these metabolites cannot be cultured or their gene  
62 clusters remain silent under laboratory culturing conditions. Natural product discovery and

63 chemical ecology studies in environmental samples are hence becoming more and more  
64 attractive<sup>5</sup>. Along with next-generation sequencing technologies, recent instrument and  
65 computational advances in nuclear magnetic resonance (NMR) spectroscopy and non-  
66 targeted liquid chromatography tandem mass spectrometry (LC-MS/MS) offer  
67 tremendous assistance to explore the uncharted metabolic space of nature<sup>6</sup>. These tools  
68 enable large-scale compound dereplication, rapid identification of chemical analogs, and  
69 *de novo* annotation of molecular formulas, substructures, chemical classes and  
70 structures<sup>7-12</sup>. However, the assignment of bioactivity of newly identified metabolites  
71 typically requires assays using pure compounds. Therefore, the isolation of specialized  
72 metabolites is typically guided by repetitive bioactivity assays. Together with full structure  
73 elucidation, this process usually takes months, and is therefore a major bottleneck for the  
74 systematic exploration of Nature for novel pharmaceutically active compounds and  
75 comprehensive chemical ecology studies.

76 A logical next step is the development of *activity metabolomics*<sup>13</sup> or *functional*  
77 *metabolomics*<sup>14</sup> approaches that aim to add functional information to the metabolites  
78 detected in a given system. Native electrospray ionization (ESI) and affinity mass  
79 spectrometry (MS) such as pulsed ultrafiltration (UF) MS, size exclusion (SEC) or affinity  
80 bead-based pull-down assays are increasingly being used to analyze non-covalent  
81 binding of biomolecules<sup>15-23</sup>. An important difference between native MS and affinity MS  
82 is that native MS detects ligands directly bound to a protein, whereas affinity MS  
83 approaches typically measure ligand binding indirectly as free compounds. For affinity  
84 MS, the target protein is captured by UF, SEC, centrifugation or magnetic removal and  
85 the released ligand is subsequently identified by small molecule MS analysis<sup>24-27</sup>. Both  
86 native and affinity MS approaches have been applied with single compounds as well as  
87 substrate pools, which allows for the simultaneous screening of thousands of compounds.  
88 An important inherent limitation in the use of ligand pools is that multiple ligands compete  
89 for binding of the target at the same site, and therefore compounds with highest affinity  
90 or concentration are more easily discovered. Additionally, the annotation of bound ligands  
91 remains a challenging task, especially if the ligand pool contains multiple isobaric  
92 compounds. While direct infusion native MS workflows have been developed that can  
93 identify metabolites bound to proteins by MS/MS<sup>28</sup>, combining the separation power of

94 ultra-high-performance liquid chromatography (UHPLC) and the selectivity of native MS  
95 and MS/MS would offer a promising improvement to decipher protein-metabolite  
96 interactions out of complex biological mixtures, such as environmental samples.  
97 However, typical UHPLC mobile phase conditions disfavor non-covalent protein binding  
98 due to an acidic pH and high organic solvent content. To perform native MS coupled to  
99 UHPLC, we developed an experimental setup that increases pH and water content of the  
100 mobile phase post-column and infuses a protein binding partner before entering the ESI  
101 interface (**Figure 1**). As the protein is constantly infused post-column, one can monitor  
102 the intact protein mass over the LC-MS run and observe mass shifts when eluting  
103 metabolites bind to the protein at a defined retention time. Using collision induced  
104 dissociation (e.g., *Higher Energy C-Trap Dissociation* (HCD) in the setup), the complex  
105 can be dissociated again in the mass spectrometer and a “binding threshold” can be  
106 applied to distinguish between specific and non-specific binding. In combination with  
107 parallel non-targeted MS/MS analyses, the mass and compound ID or compound class  
108 can be assigned (level 2 or level 3 annotation<sup>29,30</sup>).

109 After the successful proof-of-concept study, we screened for new protease inhibitors from  
110 an environmental cyanobacteria biofilm as a first application. In general, cyanobacteria  
111 have been a rich source of highly bioactive natural products<sup>31–34</sup>, and in particular  
112 protease inhibitors from numerous chemical classes<sup>35–40</sup>. Protease inhibitors are key  
113 compounds used for treatment of viral infections (SARS-CoV-2, HIV, and Hepatitis C)<sup>41,42</sup>,  
114 cancer<sup>43</sup>, diabetes<sup>44</sup>, hypertension<sup>45</sup>, and as general anticoagulants<sup>46</sup>. Several of the  
115 approved protease inhibitors are analogs of natural products such as aliskiren, captopril,  
116 and carfilzomib that target renin, angiotensin-converting enzyme, and proteasome,  
117 respectively<sup>47</sup>. In this study, we used chymotrypsin as the protease target to identify  
118 inhibitors from a marine cyanobacteria community. Using the native metabolomics  
119 approach, we identified 30 chymotrypsin binders in the methanolic crude extract with a  
120 single LC-MS run. The masses and MS/MS spectra of the binders were queried against  
121 structural and spectral databases, revealing that most of them were unknown. This led to  
122 the targeted isolation and structure elucidation of a family of new, and highly potent  
123 protease inhibitors, which we termed “rivulariapeptolides”.

## a Native Metabolomics Setup

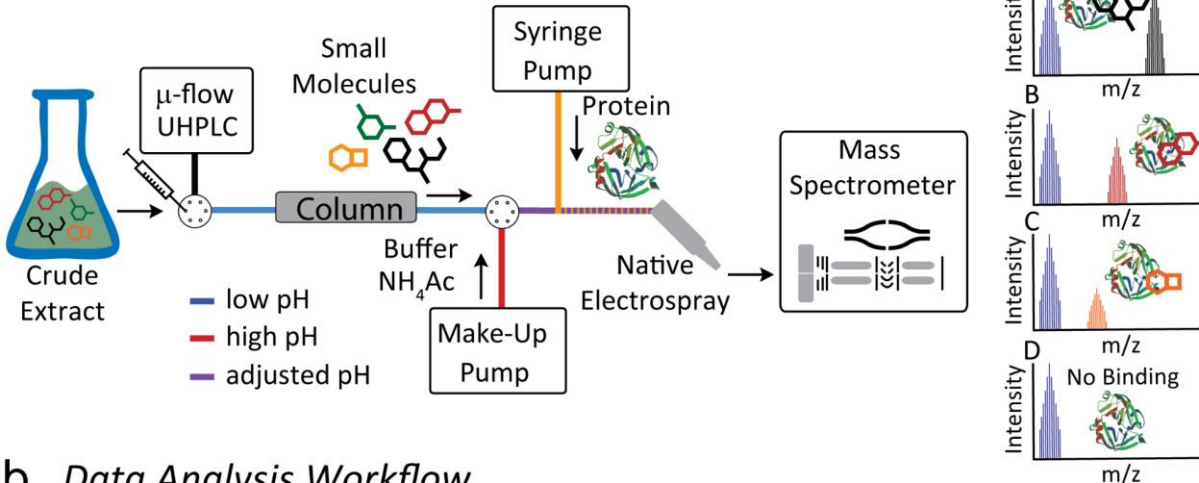

## b Data Analysis Workflow

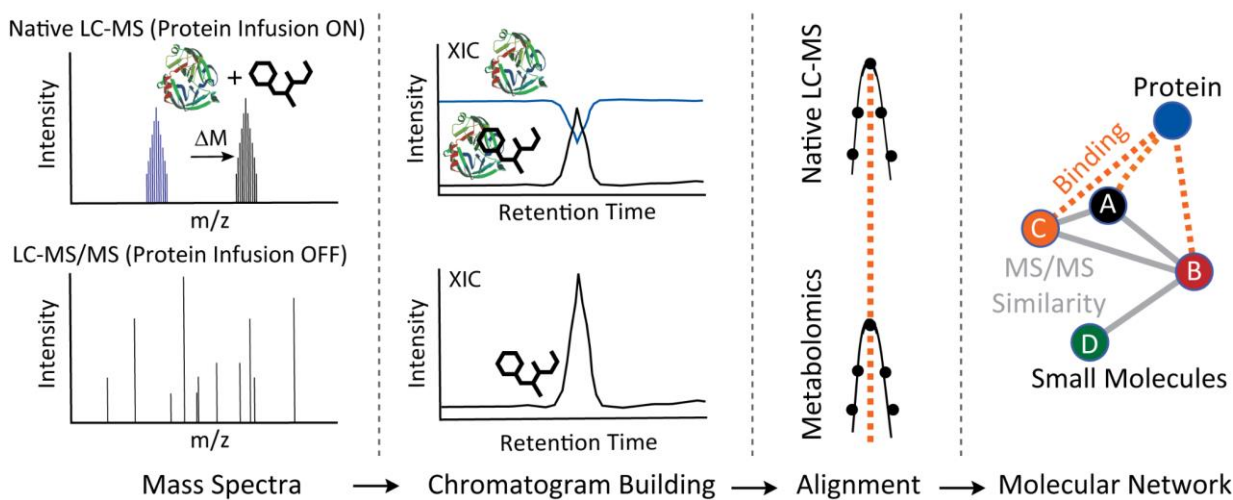

124

125 **Figure 1:** (a) Native metabolomics setup. A crude extract is separated by  $\mu$ -flow UHPLC. The pH is adjusted  
 126 after chromatography with ammonium acetate to “native-like” conditions via the make-up pump.  
 127 Orthogonally, protein of interest is infused, and the resulting protein-binder complexes are measured by  
 128 FT-MS. The procedure is repeated as a metabolomics run (high resolution UHPLC-MS/MS acquisition  
 129 without protein infusion). For the data analysis (b) the  $m/z$  and retention time of the native MS run are  
 130 correlated with  $m/z$  values and retention time of the metabolomics (LC-MS/MS) run and subsequently  
 131 visualized using molecular networking and retention time pairing that links the observed mass differences  
 132 of the protein in the native state vs bound states with the parent mass of MS/MS spectra of the small  
 133 molecule.

134

135

136

137

138

## 139 Results

### 140 Development of the native metabolomics approach

141 In a crude extract, native metabolomics provides binding information about each  
142 compound towards a protein of interest. In the experimental setup, we utilized a single  
143 10-minute LC-MS run to discover compounds that bind to the serine protease,  
144 chymotrypsin. The workflow is as follows: a crude extract is analyzed using native ESI  
145 while the protein of interest is infused post-column throughout the entire LC gradient.  
146 Binding of a small molecule to the protein of interest results in a peak with a mass  
147 corresponding to the protein bound to the compound. The  $m/z$  difference between the  
148 protein-ligand complex and the unbound protein reveals the molecular weight of the  
149 ligand while the ratio of the intensity of the protein-ligand peaks relative to the unbound  
150 protein peaks hints towards the relative binding affinity under the given conditions.

151 We first optimized the pH for native mass spectrometric acquisition of chymotrypsin and  
152 confirmed that the enzyme remains active under the native metabolomics buffer  
153 conditions. As a positive control for binding, we used molassamide<sup>48</sup>, a known non-  
154 covalent serine protease inhibitor of the 3-amino-6-hydroxy-2-piperidone (Ahp)-  
155 cyclodepsipeptide family. We found that an ammonium acetate buffer of pH 4.5 showed  
156 the highest peak intensity (**Figure S1a**). Next, we injected a serial dilution of molassamide  
157 into the native metabolomics LC-MS setup where it was mixed post-column with a  
158 constant concentration of chymotrypsin. The protein-ligand complex was detected at a  
159 deconvoluted mass of 26195.1 Da and the unbound apoprotein at 25232.6 Da (**Figure**  
160 **S1b**). The observed  $\Delta$  mass of 962.5 Da matches the mass of molassamide (962.4749  
161 Da). After deconvolution and integrating the peak area of the protein-ligand complex and  
162 plotting it against the molassamide concentration in the peak window, we obtained a  
163 binding curve. The resulting curve depicts a concentration-dependent increase of protein-  
164 ligand to unbound protein ratio with increasing ligand concentration (**Figure S1c**). The  
165 limit of detection for the molassamide-chymotrypsin interaction was between 0.1 and 1  
166  $\mu\text{g/mL}$  (1 - 10 ng on column) (**Figure S1d**). To further test the biological relevance of the  
167 native metabolomics conditions, chymotrypsin was assayed with crude extract from the  
168 cyanobacterium *Rivularia* sp. using a fluorescence substrate competition assay. The

169 bioassay conditions were designed to mimic the pH and solvent composition expected in  
170 the native mass spectrometry setup. Although chymotrypsin is optimally active in near-  
171 neutral pH, it retains good activity in 10 mM ammonium acetate at pH 4.5. Under these  
172 conditions, chymotrypsin was completely inhibited by 10 µg/mL of extract with 50%  
173 inhibition at 0.84 µg/mL (**Figure S1e**). Chymotrypsin was then assayed in increasing  
174 concentrations of acetonitrile (ACN) to determine if enzyme activity was retained in this  
175 solvent. Activity was reduced by 9% to 34% in ACN concentrations up to 33.3% v/v. In  
176 the presence of 41.7% v/v ACN, which corresponds to the end of the UHPLC gradient  
177 after the make-up addition, activity was decreased by 70% (**Figure S1f**). These results  
178 confirmed that chymotrypsin can be used as a target protease for native metabolomics  
179 as it retains activity at pH 4.5 in ACN concentrations up to 42% and binds to compounds  
180 from an inhibitory crude extract. To test the variability of the changing ACN concentration  
181 during the LC separation, we performed a series of flow injections (without column) over  
182 the full gradient (**Figure S2a**). The XIC of the molassamide bound chymotrypsin reveals  
183 similar signal responses throughout the gradient (5-99% ACN on column). While injecting  
184 a pool of control compounds at concentrations of 10 µg/mL, we observed compound  
185 specific signal responses of the chymotrypsin-ligand complexes (**Figure S2b**). To further  
186 assess the specificity of the protein-small molecule interactions, we evaluated binding of  
187 the linear oligopeptidic cysteine protease inhibitor gallinamide A, the cyclic depsipeptide  
188 FR900359, the isoflavone genistein, the phenol phloroglucinol, and the anthraquinone  
189 quinalizarin<sup>33,49,50</sup>. We did not observe binding of these negative controls to chymotrypsin  
190 under native MS conditions (**Figure S2c**).

191

## 192 **Native metabolomics reveals chymotrypsin binders**

193 Following the successful proof-of-concept experiments, we next screened for potential  
194 chymotrypsin binders from a crude extract of a biofilm from the marine cyanobacterium  
195 *Rivularia* sp, collected from coral sediments at Carlos Rosario Beach in Culebra, Puerto  
196 Rico, U.S. The methanol extract was separated by reversed-phase UHPLC and  
197 ammonium acetate buffer and chymotrypsin were infused post-column, prior to native ESI  
198 and acquisition of mass spectrometry data in the high  $m/z$  range (2500-5000  $m/z$ ). The  
199 crude extract was subsequently re-injected, without infusion of chymotrypsin to obtain

200 high-resolution LC-MS/MS data of compounds in the extract in the low  $m/z$  range (300-  
201 2000  $m/z$ ).

202 As a first step of data analysis, we plotted the total ion current (TIC) of the crude extract  
203 metabolomics data (**Figure 2a**, left) and extracted ion chromatogram (XIC) of the apo-  
204 chymotrypsin from charge state deconvoluted native mass spectrometry data (**Figure 2a**,  
205 right) which shows several negative peaks in the range of 4.5 - 5.5 minutes. The decrease  
206 in signal of the apo-protein in that retention time range is due to the emergence of larger  
207 masses that correspond to protein-ligand complexes. After feature finding of the  
208 deconvoluted masses and matching of the parallel metabolomics LC-MS/MS data of the  
209 crude extracts by retention time and exact mass matching, we could identify more than  
210 30 potential small molecule-protein complexes. To display the family of small molecules  
211 that form protein ligand complexes and to show their structural relations, we visualized  
212 them in a correlation molecular network (**Figure 2b**) that is based on their MS/MS  
213 similarity (grey line), retention time, and mass matching between protein and small  
214 molecules through the red dashed lines.

215 Two of the most abundant being  $m/z$  1186.6400 and  $m/z$  1156.5923 that also show  
216 perfect overlap of the chromatographic profiles between intact protein and metabolomics  
217 LC-MS/MS data (**Figure 2c**). Based on their high relative abundance we targeted them  
218 for further purification, structure determination by NMR and orthogonal protease inhibition  
219 assays.



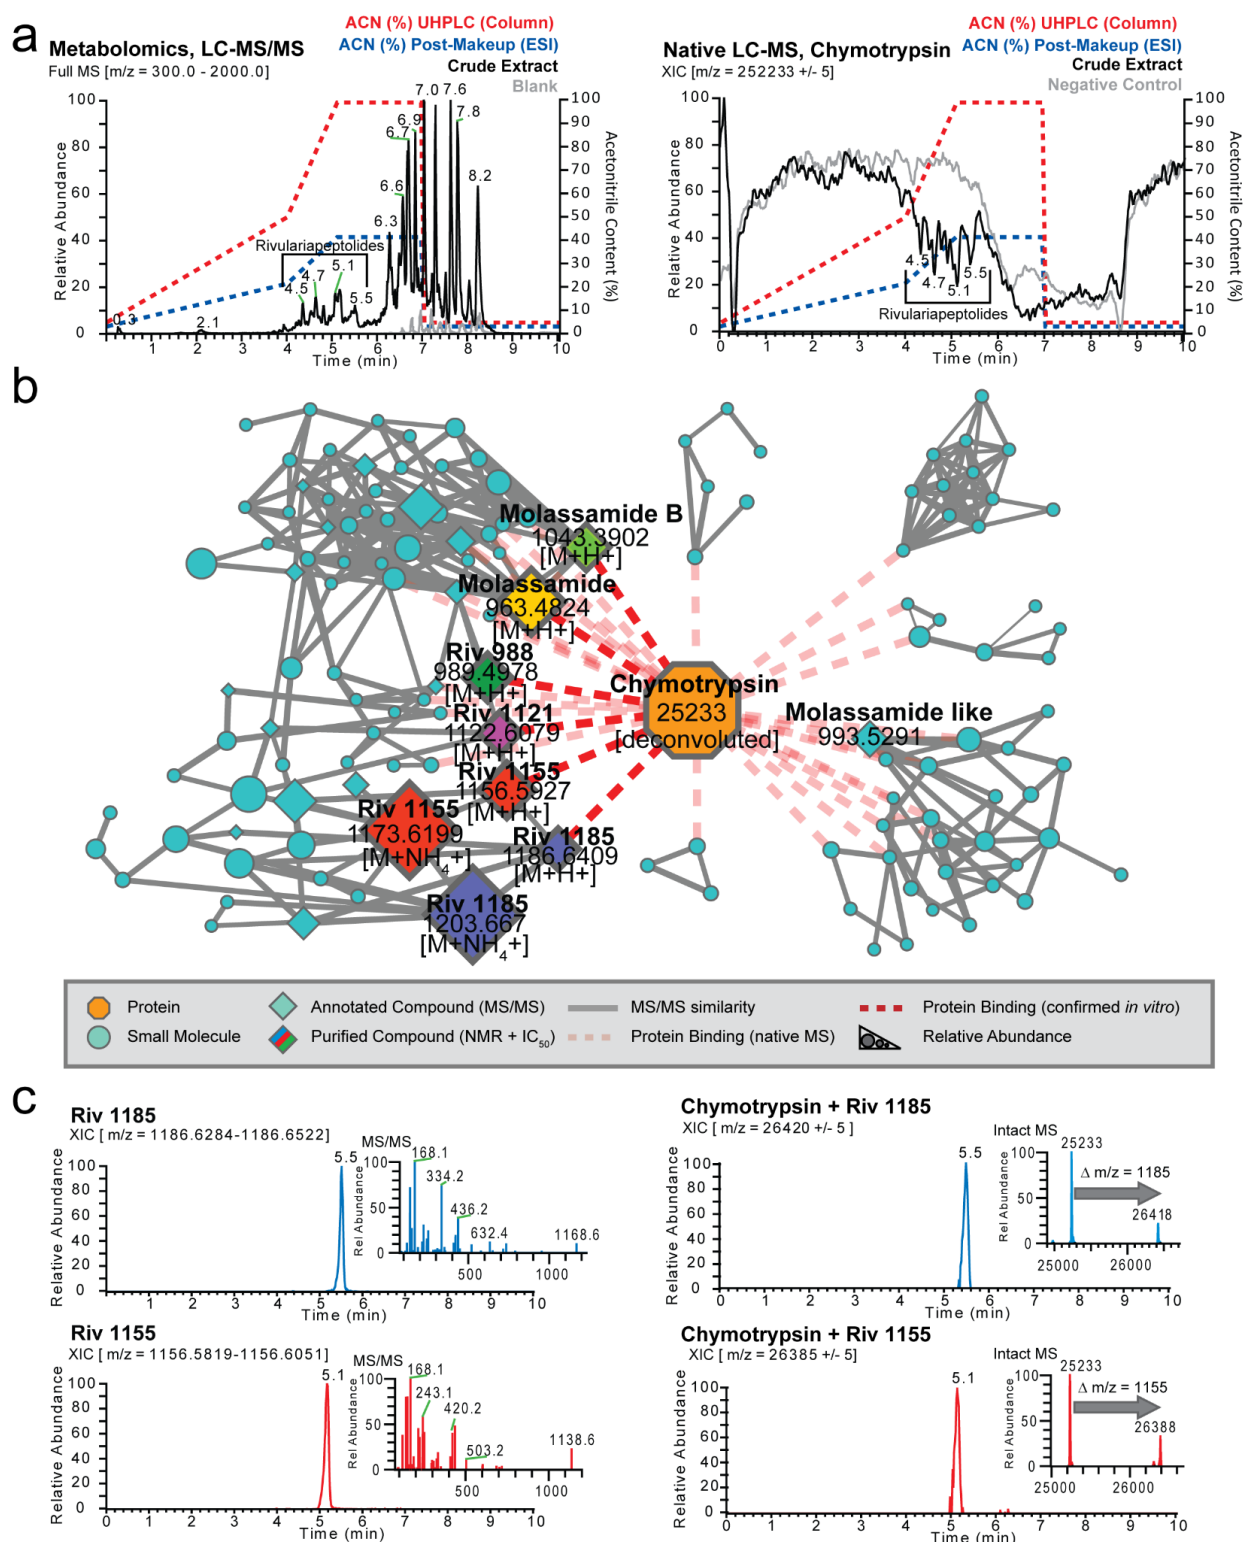

220

221 **Figure 2:** (a) Left panel: Full mass spectrum ( $m/z$  300 - 2,000) of cyanobacterial crude extract and blank.  
 222 The retention times (RT = 4.5 - 5.5 min) of major Ahp-cyclodepsipeptides are highlighted. Right panel:  
 223 Deconvoluted extracted ion chromatogram ( $m/z$  25,233  $\pm$  5) of alpha-chymotrypsin screened against the  
 224 cyanobacterial crude extract under native MS conditions and negative control. Acetonitrile (ACN)

225 concentration on column and post-column (including make-up) are shown as dashed lines. The ACN  
226 concentrations are given at pump for a given time and a ~ 2 min delay time between pump and column has  
227 to be taken into account. (b) Correlation molecular network of deconvoluted chymotrypsin and putatively  
228 new small molecule inhibitors binders by native MS (A larger version of the network with detailed precursor  
229 mass labels of all nodes is available in the supporting information Figure S3). (c) Upper left panel: Extracted  
230 ion chromatogram ( $m/z$  1,186.6284 - 1,186.6522) and MS<sup>2</sup> spectrum of putative new chymotrypsin-binder  
231 rivulariapeptolide 1185 at RT = 5.5 min. Upper right panel: Extracted ion chromatogram ( $m/z$  26,420 ± 5)  
232 of a putative chymotrypsin-binder complex. Mass difference between the putative chymotrypsin-binder  
233 complex ( $m/z$  26,420 ± 5) and apo-chymotrypsin (25,233 ± 5) suggests a molecular weight of 1,187 ± 5 Da  
234 for the putative chymotrypsin binder rivulariapeptolide 1185. Lower left panel: Extracted ion chromatogram  
235 ( $m/z$  1,156.5819 - 1,156.6051) and MS<sup>2</sup> spectrum of putative chymotrypsin-binder rivulariapeptolide 1185  
236 at RT = 5.1 min. Lower right panel: Extracted ion chromatogram ( $m/z$  26,385 ± 5) of a putative chymotrypsin-  
237 binder complex. Mass difference between the putative chymotrypsin-binder complex ( $m/z$  26,385 ± 5) and  
238 apo-chymotrypsin (25,233 ± 5) suggests a molecular weight of 1,152 ± 5 Da for the putative chymotrypsin  
239 binder rivulariapeptolide 1155.

240

241

## 242 **Rivulariapeptolides, a family of new Ahp-cyclodepsipeptides**

243 The potential chymotrypsin binder with the  $m/z$  1186.6400, identified by native  
244 metabolomics, was next targeted for isolation and structure elucidation, using state-of-  
245 the-art high-resolution MS/MS and NMR approaches<sup>51</sup>. We first separated the *Rivularia*  
246 crude extract into four fractions of decreasing polarity via solid phase extraction. SMART  
247 NMR<sup>11</sup> analysis was applied to the most hydrophilic fraction and all but one structure of  
248 the top 10 SMART results were predicted as cyclic depsipeptides (**Figures 3a/b, S4**),  
249 including 6 of the top 10 as Ahp-cyclodepsipeptides (three from marine filamentous  
250 cyanobacteria: somamide B, molassamide, lyngbyastatin 6)<sup>48,52-54</sup>. Complementarily,  
251 MS/MS-based molecular networking analysis of the *Rivularia* crude fractions assisted  
252 with the annotation of the known Ahp-peptides molassamide, kurahamide, and  
253 loggerpeptin A along with several putatively new ones (**Figure 3a/b, S5a**)<sup>48,53,55</sup>. Next, the  
254 SIRIUS and ZODIAC tools<sup>56,57</sup> were applied to determine the molecular formula of the  
255 chymotrypsin-binding feature, with exact mass  $m/z$  1186.6400 [M+H]<sup>+</sup>, as C<sub>61</sub>H<sub>87</sub>N<sub>9</sub>O<sub>15</sub>  
256 (0.5 ppm). Subsequently, we classified the MS/MS spectrum indicative for a 'cyclic  
257 depsipeptide' based on the classification with CANOPUS<sup>9</sup>. Further substructures of the  
258 molecule were predicted as benzene, hydroxy-benzene, and proline/*N*-acyl-pyrrolidine  
259 derivatives, as well as piperidinone/delta-lactam for the Ahp-family defining moiety  
260 (**Figures 3c, S5b**).

261 To unambiguously determine the structure, we isolated  $m/z$  1186.6400, named  
262 rivulariapeptolide 1185 (**1**), and performed 1D/2D NMR experiments and manual MS/MS  
263 interpretation (**Figure 3d, Figures S6-S11, S41, Table S1**). Subsequently, we targeted  
264 the isolation of further rivulariapeptolides by preparative HPLC, based on their protein-  
265 ligand complex ratios from the native metabolomics experiments as well as their relative  
266 abundance. In that way, we isolated and elucidated the planar structures of the  
267 rivulariapeptolides 1185, 1155, 1121, and 989 (**1, 2, 3, 4**) with the exact masses  
268 1186.6400 [M+H]<sup>+</sup> (C<sub>61</sub>H<sub>88</sub>N<sub>9</sub>O<sub>15</sub>, 0.5 ppm), 1156.5923 [M+H]<sup>+</sup> (C<sub>59</sub>H<sub>82</sub>N<sub>9</sub>O<sub>15</sub>, - 0.2 ppm),  
269 1122.6080 [M+H]<sup>+</sup> (C<sub>56</sub>H<sub>84</sub>N<sub>9</sub>O<sub>15</sub>, - 0.1 ppm) and 989.4978 [M+H]<sup>+</sup> (C<sub>50</sub>H<sub>69</sub>N<sub>8</sub>O<sub>13</sub>, - 0.1  
270 ppm). In addition to rivulariapeptolides, we identified the already known molassamide (**5**)  
271 as well as new derivative of the latter that we termed “molassamide B” (**6**) with  $m/z$   
272 1041.3924 [M+H]<sup>+</sup> (C<sub>48</sub>H<sub>66</sub>BrN<sub>8</sub>O<sub>13</sub>, -0.3 ppm), which is ortho-brominated (**Figures S12-**  
273 **S41, Tables S2-S3**). The absolute configurations of the amino acids were determined by  
274 UHPLC-MS analysis of the acid hydrolysates of **2** and its pyridinium dichromate oxidation  
275 product and subsequent advanced Marfey’s analysis (**Figure S42a**). The analyses  
276 revealed L-configurations for all amino acids as is the case for other cyanobacterial Ahp-  
277 cyclodepsipeptides. The relative configuration of the stereocenters of the (3S, 6R)-Ahp  
278 unit as well as the geometry of the double bond (Z-configuration) of the 2-amino-2-  
279 butenoic acid (Abu) moiety was determined by NOESY and HMBC NMR experiments  
280 (**Figure S42b**). Assuming that the other rivulariapeptolides (**1, 3, 4**) and molassamides  
281 (**5+6**) described here originate from the same biosynthetic peptide synthetase, they most  
282 probably also share the same backbone configuration. The highly comparable MS/MS  
283 and NMR data sets of compounds **1–6** (**Figures S6-S41, Tables S1-S3**) provide  
284 additional evidence that the discovered Ahp-cyclodepsipeptides from this study share the  
285 same configuration.

286 Finally, the chymotrypsin inhibitory activities of the purified Ahp-cyclodepsipeptides **1-6**  
287 were assessed by specific biochemical assays and confirmed the results of the native  
288 metabolomic protein infusion MS experiments (**Figure 4**). All six compounds were found  
289 to be nanomolar chymotrypsin inhibitors with compound **1** being the most potent (**Figure**  
290 **4**, IC<sub>50</sub> = 13.17 ± SD nM). The newly described family of rivulariapeptolides is  
291 characterized by a rare (duplicated) *N*-butyrylated proline moiety in the side chain. All for

292 the first time described peptides **1-4** and **6** reside among the six most potent chymotrypsin  
 293 inhibitors, so far reported from the compound class of Ahp-cyclodepsipeptides (**Table**  
 294 **S4**).

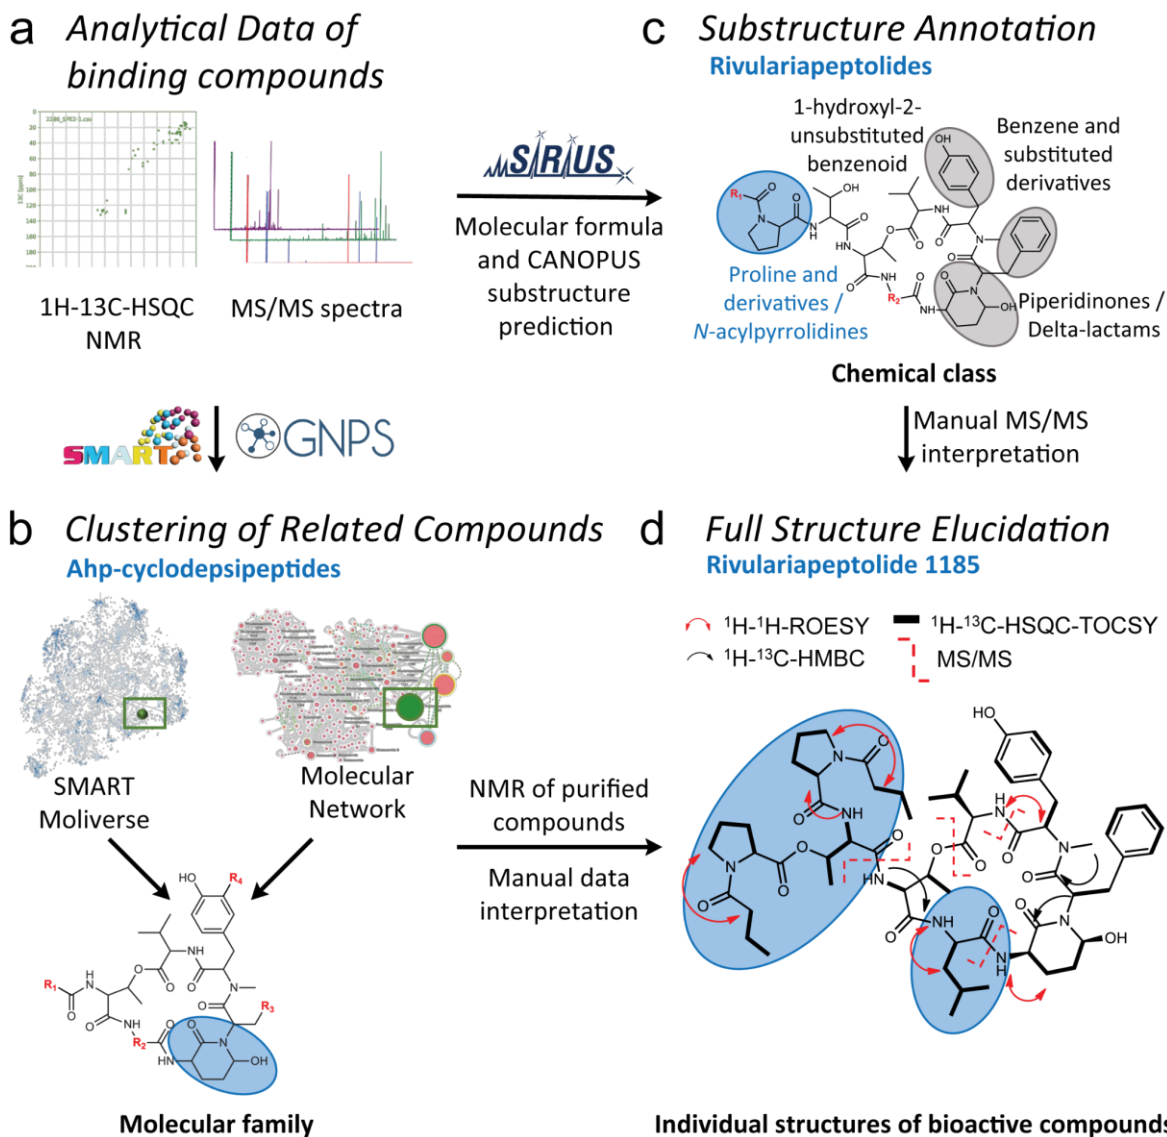

295 **Figure 3:** Structure elucidation workflow based on NMR and MS/MS data (a). The workflow combined  
 296 automated *in-silico* MS/MS and NMR annotation tools for fast compound class identification and  
 297 dereplication of known natural products exemplified by the new natural product rivulariapeptolide 1185. (b)  
 298 Molecular networking and SMART analysis suggested the presence of a Ahp-cyclodepsipeptide molecular  
 299 family (c) In depth MS and MS/MS analysis of the new natural products with SIRIUS helped to establish  
 300 the molecular formula and substructural information about the characteristic *N*-acylated proline residues.  
 301 (d) Unambiguous structure elucidation by various 1D/2D NMR and MS/MS experiments led to the planar  
 302 structure of rivulariapeptolide 1185. Selected 2D NMR-derived correlations and MS<sup>2</sup> fragmentations are  
 303 depicted. The distinctive structural moieties are highlighted in grey and blue bubbles.  
 304

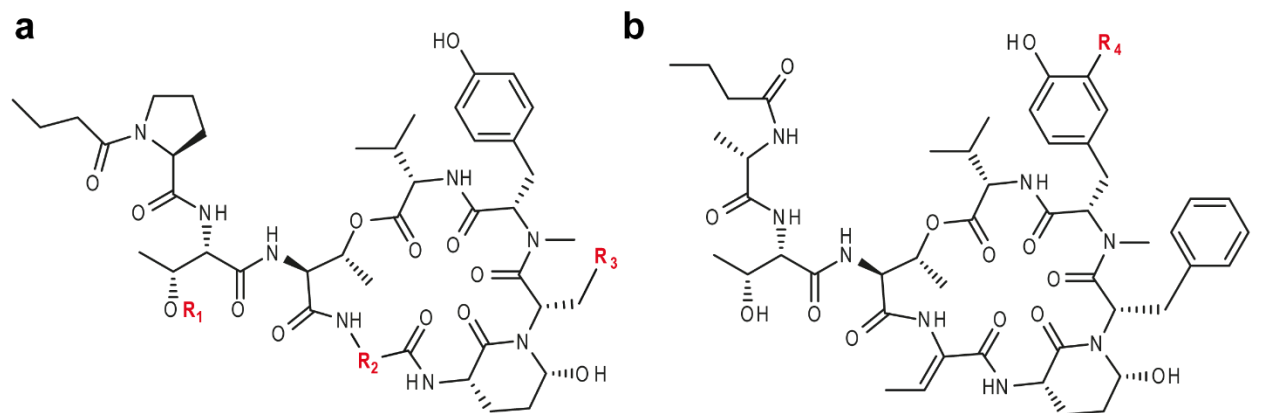

| Compound                    | R <sub>1</sub>    | R <sub>2</sub>           | R <sub>3</sub> | R <sub>4</sub> | IC <sub>50</sub> Chymo-<br>trypsin [nM] | IC <sub>50</sub> Elastase<br>[nM] | IC <sub>50</sub> Proteinase K<br>[nM] |
|-----------------------------|-------------------|--------------------------|----------------|----------------|-----------------------------------------|-----------------------------------|---------------------------------------|
| Rivulariapeptolide 1185 (1) | <i>N</i> -Ba-Pro- | -CH-CH <sub>2</sub> -iPr | Ph             |                | 13.17                                   | 23.59                             | 55.26                                 |
| Rivulariapeptolide 1155 (2) | <i>N</i> -Ba-Pro- | -C=CH-CH <sub>3</sub>    | Ph             |                | 41.84                                   | 4.94                              | 56.54                                 |
| Rivulariapeptolide 1121 (3) | <i>N</i> -Ba-Pro- | -C=CH-CH <sub>3</sub>    | iPr            |                | 35.52                                   | 13.24                             | 48.05                                 |
| Rivulariapeptolide 988 (4)  | H                 | -C=CH-CH <sub>3</sub>    | Ph             |                | 95.46                                   | 15.29                             | 85.50                                 |
| Molassamide (5)             |                   |                          |                | H              | 862.60                                  | 37.58                             | 21.61                                 |
| Molassamide B (6)           |                   |                          |                | Br             | 24.65                                   | 11.69                             | 5.42                                  |

305  
306 **Figure 4:** (a) Structures of the isolated rivulariapeptolides 1185 (1), 1155 (2), 1121 (3), 988 (4). (b)  
307 Structures of the isolated known molassamide (5), and the new molassamide B (6). (b) Potency of isolated  
308 compounds for selected serine proteases following 40 min pre-incubations. Data are presented as the mean  
309  $\pm$  SD, n = 3. Abbreviations: Ba = butyric acid, Pro = proline.

310  
311 Intriguingly, a single ortho-bromination in the *N*-methyltyrosine moiety led to a 35-fold  
312 increase in potency for the new compound 6 (IC<sub>50</sub> = 24.65  $\pm$  SD nM), when compared to  
313 the known compound 5 (IC<sub>50</sub> = 862.60  $\pm$  SD nM). These promising results led us to test  
314 these six Ahp-cyclodepsipeptides against two other serine proteases, elastase and  
315 proteinase K. Elastase is produced in either the pancreas, for digestion of food, or by  
316 neutrophils for degradation of foreign proteins. Neutrophil elastase is a well-established  
317 drug target for treatment of acute lung injury and acute respiratory distress syndrome<sup>58</sup>.  
318 Proteinase K is a fungal serine endopeptidase that is commonly used in molecular biology  
319 procedures<sup>59</sup>. This enzyme family are play important roles in fungal infection of insects<sup>60</sup>  
320 and mammals<sup>61</sup>. While 2 was found to be a potent elastase inhibitor (IC<sub>50</sub> = 4.94  $\pm$  SD

321 nM), **6** was discovered to be the most potent proteinase K inhibitor known to date ( $IC_{50} =$   
322  $5.42 \pm SD$  nM). The isolated compounds were docked by induced-fit, inside the binding  
323 pocket of alpha-chymotrypsin (PDBID 4Q2K) and all were found to have a similar binding  
324 mode (**Figure S43**) that was revealed by crystal structures of Ahp-cyclodepsipeptides in  
325 complex with serine proteases<sup>62,63</sup>.

326

327

## 328 **Discussion**

329 Here we describe the use of native metabolomics protein infusion MS to simultaneously  
330 detect protein-metabolite binding and annotate their molecular structures. This approach  
331 can be used for rapid screening of small molecule modulators for proteins of interest,  
332 directly from crude extracts. In our case study, we identified 30 chymotrypsin binding  
333 natural products in a 10 min LC-MS run from a few  $\mu$ g of crude extract (not including  
334 downstream isolation and *de novo* structure elucidation). In comparison to flow injection  
335 experiments (injection of crude extract in the native MS setup without column) we  
336 observed strong signal decrease, most likely through collective ion suppression effects  
337 (**Figure S2d**, left panel). When injecting preincubated chymotrypsin-crude extract mixture  
338 into our system (**Figure S2d**, right panel) we observed more acceptable signal response  
339 and several protein-metabolite complexes, which we attributed to molassamide B, a  
340 molassamide derivative and rivulariapeptolide 1185. However, in comparison to native  
341 metabolomics, the number of putative binders observed was significantly lower, indicating  
342 that chromatographic separation is an important factor for the sensitivity of the approach.  
343 Most importantly, the chromatographic dimension is also essential for the unambiguous  
344 linking of binding information to MS/MS features which facilitates dereplication and  
345 downstream structure elucidation.

346 Native metabolomics is generalizable to other protein targets that are accessible via  
347 native ESI<sup>64-66</sup> and which are available in large enough quantities. The amounts of protein  
348 needed for native metabolomics high-throughput screening are a few mg for a 24 h screen  
349 of 96 samples with a 10 min LC-MS method, which is achievable for many commercially  
350 available proteins or in-house heterologous protein expression.

351 Besides the ad-hoc experimental determination of binding information, we systematically  
352 organized this information in the public GNPS spectral library through spectrum tags.  
353 Hence, native metabolomics derived properties are accessible in future experiments and  
354 can provide biological context to complex metabolomes.

355 While we primarily used the method for an initial screening approach and assigned binary  
356 binding information (binder/non-binder), titration experiments using native mass  
357 spectrometry can be used to determine relative dissociation constants ( $K_d$ ) by fitting the  
358 intensity ratio of bound and unbound protein as a function of the added ligand. This  
359 method first assumes that no dissociation takes place during the transmission through  
360 the mass spectrometer, and second, that the observed gas phase intensity ratio  
361 correlates with the solution ratio. These assumptions imply that ESI titration  
362 measurements can deliver a relative “snapshot” of the solution concentrations to reflect  
363 solution-phase binding affinities. Nevertheless, as the experimental environment is  
364 inherently different (gas phase vs. solution) absolute binding affinities might differ from  
365 solution based orthogonal assays<sup>67</sup>.

366 From a natural product discovery perspective, it is very interesting that 30 putative  
367 bioactive molecules for a target protein were discovered from a single extract. This  
368 indicates that the chemical space for certain bioactive molecular families can often be  
369 underestimated when compared to traditional bioactivity-guided approaches, as they are  
370 typically biased towards the most abundant or most active compounds. At least for Ahp-  
371 cyclodepsipeptides, recent biosynthetic studies suggest that the high structural diversity  
372 of these compounds is mainly driven by the hypervariability of amino acids in the positions  
373 proceeding and following the Ahp-unit (see **Figure 4a** for the definitions of residues  $R_3$   
374 and  $R_2$ , respectively)<sup>68</sup>. The events impacting  $R_2$  can be explained by high-frequency  
375 point mutations. This is sought to provide an evolutionary platform to iteratively test  
376 combinations while maintaining the central activity. However, the amino acid substitutions  
377 at  $R_3$  most likely occur via recombination events, thereby allowing for evolutionary  
378 shortcuts<sup>68</sup>. These biosynthetic hypotheses are supported by the compounds isolated in  
379 this study and add to a better understanding of structure-activity relationships for Ahp-  
380 cyclodepsipeptides. Comparing rivulariapeptolide 1185 (**1**) to rivulariapeptolide 1121 (**3**),

381 a leucine residue is swapped for an Abu unit at R<sub>2</sub>, and phenylalanine is replaced by  
382 leucine at R<sub>3</sub>. The most surprising structure-activity relationship gained from this study,  
383 however, was that a single substitution of bromine (molassamide B, **6**) for hydrogen  
384 (molassamide, **5**) led to a thirtyfive-, three-, and four-fold increase in potency towards  
385 chymotrypsin, elastase, and proteinase K, respectively.

386 The protease inhibition of the compounds discovered with the native metabolomics  
387 workflow was confirmed with an orthogonal fluorescence assay against three proteases.  
388 At nanomolar concentration their IC<sub>50</sub> show high potency and exhibit distinct selectivity  
389 (**Figure 4, Table S4**). For example, molassamide (**5**) is the second most potent inhibitor  
390 screened against proteinase K but is the least potent inhibitor for chymotrypsin and  
391 elastase. Rivulariapeptolide 1155 (**2**), on the other hand, is the most potent elastase  
392 inhibitor but shows much lower inhibition against both chymotrypsin and proteinase K.

393 Together, these findings highlight the utility of native metabolomics approach presented  
394 herein. Beyond the discovery of novel protease inhibitors, we anticipate that native  
395 metabolomics will be applied for the screening of a broad variety of interactions of  
396 biomolecules from complex mixtures at scale. We anticipate that native metabolomics will  
397 be used as a central tool for activity/ functional metabolomics workflows. This will not only  
398 benefit drug discovery and chemical ecology studies but could also be leveraged for the  
399 generation of large-scale training data for machine learning approaches to predict protein-  
400 ligand interaction.

401

402

## 403 **Methods**

### 404 **Cyanobacterial collection and taxonomy**

405 Marine cyanobacteria biofilm samples were collected in an intertidal zone growing on  
406 rock/reef substrate near Las Palmas Beach, Manatí, Puerto Rico, U.S. (GPS coordinates:  
407 18°28'32.0"N 66°30'00.5"W) on May 14th, 2019, and at 0.5 – 2.0 m of water at Carlos  
408 Rosario Beach in Culebra, Puerto Rico, U.S (GPS coordinates: 18°19'30.0"N  
409 65°19'48.0"W) on April 6th, 2019. Biomass for both samples was hand collected (DRNA  
410 Permit O-VS-PVS15-SJ-01165-15102020). Microscopic examination indicated that this



411 collection was morphologically consistent with the genus *Rivularia*. 16S rDNA analysis  
412 confirmed the identity as *Rivularia* spp. PCC 7116. Voucher specimen available from  
413 E.C.D. as collection no. MAP14MAY19-1, and from W. H. G. as collection no.  
414 CUR6APR19-1.

415

#### 416 **Micro-flow LC-MS/MS data acquisition**

417 For micro-flow UHPLC-MS/MS analysis 2  $\mu$ L were injected into vanquish UHPLC system  
418 coupled to a Q-Exactive (setup A) or a Q-Exactive HF (setup B) quadrupole orbitrap mass  
419 spectrometer (Thermo Fisher Scientific, Bremen, Germany) with an Agilent 1260  
420 quaternary HPLC pump (Agilent, Santa Clara, USA) or in setup B a fully integrated  
421 vanquish quaternary UHPLC pump (Thermo Fisher Scientific, Bremen, Germany) as  
422 make-up pumps. For reversed-phase chromatographic, a C18 core-shell microflow  
423 column (Kinetex C18, 150 x 1 mm, 1.8  $\mu$ m particle size, 100 Å pore size, Phenomenex,  
424 Torrance, USA) was used. The mobile phase consisted of solvent A ( $H_2O$  + 0.1 % formic  
425 acid (FA)) and solvent B (acetonitrile (ACN) + 0.1 % FA). The flow rate was set to 150  
426  $\mu$ L/min (setup A) or 100  $\mu$ L/min (setup B). In setup A, a linear gradient from 5-50 % B  
427 between 0-4 min and 50-99 % B between 4 and 5 min, followed by a 2 min washout phase  
428 at 99% B and a 3 min re-equilibration phase at 5 % B. In setup B, a linear gradient from  
429 5-50 % B between 0-8 min and 50-99 % B between 8 and 10 min, followed by a 3 min  
430 washout phase at 99% B and a 5 min re-equilibration phase at 5 % B. Data-dependent  
431 acquisition (DDA) of MS/MS spectra was performed in positive mode. Electrospray  
432 ionization (ESI) parameters were set to 40 arbitrary units (AU) sheath gas flow, auxiliary  
433 gas flow was set to 10 AU and sweep gas flow was set to 0 AU. Auxiliary gas temperature  
434 was set to 400 °C. The spray voltage was set to 3.5 kV and the inlet capillary was heated  
435 to 320 °C. S-lens level was set to 70 V applied. MS scan range was set to 200-2000  $m/z$   
436 with a resolution at  $m/z$  200 ( $R_{m/z\ 200}$ ) of 70,000 with one micro-scan. The maximum ion  
437 injection time was set to 100 ms with automatic gain control (AGC) target of  $5E5$ . Up to  
438 two MS/MS spectra per duty cycle were acquired at  $R_{m/z\ 200}$  17,000 with one micro-scan.  
439 The maximum ion injection time for MS/MS scans was set to 100 ms with an AGC target  
440 of  $5.0E5$  ions and a minimum 5% AGC. The MS/MS precursor isolation window was set  
441 to  $m/z$  1. The normalized collision energy was stepped from 20 to 30 to 40% with  $z = 1$

442 as the default charge state. MS/MS scans were triggered at the apex of chromatographic  
443 peaks within 2 to 15 s from their first occurrence. Dynamic precursor exclusion was set  
444 to 5 s. Ions with unassigned charge states were excluded from MS/MS acquisition as well  
445 as isotope peaks. For native metabolomics experiments, the same chromatographic  
446 parameters were used and in addition 220  $\mu\text{L}/\text{min}$  (setup A) or 150  $\mu\text{L}/\text{min}$  (setup B) 10  
447 mM ammonium acetate buffer was infused post-column through a make-up pump and a  
448 PEEKT-splitter and enzyme solution was infused with 2  $\mu\text{L}/\text{min}$  flow rate via the integrated  
449 syringe pump. ESI settings were set to 40 arbitrary units (AU) sheath gas flow, auxiliary  
450 gas flow was set to 10 AU and sweep gas flow was set to 0 AU. Auxiliary gas temperature  
451 was set to 400  $^{\circ}\text{C}$ . The spray voltage was set to 3.5 kV and the inlet capillary was heated  
452 to 300  $^{\circ}\text{C}$ . S-lens level was set to 80 V applied. MS scan range was set to 2000-4000  $m/z$   
453 with a resolution  $R_{m/z200}$  140,000 with 2 microscans. MS acquisition was performed in all  
454 ion fragmentation (AIF) mode with  $R_{m/z200}$  with 20% HCD collision energy and an isolation  
455 window of 2000 - 4000  $m/z$  (setup A) or 2500 - 4000  $m/z$  (setup B).

456

#### 457 **Native metabolomics data analysis**

458 For native LC-MS data, multiple charged spectra were deconvoluted using the xtract  
459 algorithm in Qualbrowser, part of the Xcalibur software (Thermo Scientific). Both  
460 deconvoluted native LC-MS and metabolomics LC-MS/MS .raw files were converted to  
461 centroid .mzML file format using MSconvert of the proteowizard software package.  
462 Feature finding of both file types was performed using a modified version of MZmine2.37  
463 (corr.17.7). Feature tables from both intact protein mass and metabolomics data were  
464 matched by their retention time (RT) and an  $m/z$  offset corresponding to the mass of  
465 chymotrypsin (25234 Da) with an RT tolerance of 0.2 min and a mass tolerance of 4 Da.  
466 Feature tables (.csv), MS/MS spectra files (.mgf), and ion identity networking results (.csv)  
467 were exported and uploaded to the MassIVE repository. LC-MS/MS data was submitted  
468 to GNPS for feature-based molecular networking analysis. Downstream combined  
469 Molecular-Networks and chymotrypsin small molecule binding were visualized as  
470 networks in cytoscape (3.8.2).

471

472

473 **pH dependency of native metabolomics**

474 pH values over the entire LC gradient and peak intensities were both assessed using  
475 three different make-up solvents. Make-up solvent A was water, make-up solvent B was  
476 10 mM ammonium acetate buffer, and make-up solvent C was 10 mM ammonium acetate  
477 buffer + 0.2% ammonium hydroxide, v/v. Molassamide was prepared as 100  $\mu$ M solutions  
478 from a 10 mM stock solution in DMSO by preparing a 1:100 dilution into solvent mixture  
479 1 (water + 10% acetonitrile + 0.1% formic acid). Samples were analyzed as described in  
480 micro-flow LC-MS/MS data acquisition (setup A); 2  $\mu$ L of each solution were injected into  
481 the mass spectrometer, while chymotrypsin (Sigma), dissolved in water to a final  
482 concentration of 2 mg/mL, was injected through the syringe pump at a flow rate of 2  
483  $\mu$ L/min. pH values were assessed by disconnecting the flow to the source and collecting  
484 ~30  $\mu$ L of solvent every minute then testing this value on pH paper.

485

486 **Titration of ligands and concentration dependency**

487 Molassamide, Riv 1155, and Riv 1185 were prepared as 100  $\mu$ M solutions from a 10 mM  
488 stock solution in DMSO by preparing a 1:100 dilution into solvent mixture 1 (water + 10%  
489 acetonitrile + 0.1% formic acid). From this 100  $\mu$ M solution, dilutions were prepared at 10  
490  $\mu$ M, 1  $\mu$ M, and 0.1  $\mu$ M into solvent mixture 1. 2  $\mu$ L of each solution were injected into the  
491 mass spectrometer, then 5  $\mu$ L and 10  $\mu$ L of the 100  $\mu$ M solution were injected to yield  
492 final concentrations of 250  $\mu$ M and 500  $\mu$ M, respectively. Samples were analyzed as  
493 described in Micro-Flow LC-MS/MS data acquisition (setup A), while chymotrypsin  
494 (Sigma Aldrich) was dissolved in water to a final concentration of 2 mg/mL and injected  
495 through the syringe pump at a flow rate of 2  $\mu$ L/min. The ratio of bound to unbound protein  
496 was plotted against the ligand concentration in a given HPLC peak window. Data points  
497 were fitted using the solver function.

498

499 **Determination of limit of detection, selectivity, and flow-injection experiments**

500 Molassamide was dissolved in 50% MeOH and a serial dilution with a dilution factor of 2  
501 and 10 were performed yielding final concentrations of 100, 50, 10, 1, and 0.1  $\mu$ g/mL. 2  
502  $\mu$ L of each dilution were injected into the native metabolomics microflow LC-MS system  
503 (setup B) and peak areas from chymotrypsin bound molassamide were extracted and

504 plotted against their concentration. For testing the selectivity of the method, a series of  
505 standards (gallinamide A, FR900359, quinalizarin, genistein, phloroglucinol,  
506 cymodepsipeptide A, lingaoamide, molassamide B, rivulariapeptolide 1121,  
507 rivulariapeptolide 1185, tutuilamide A) were dissolved to 100 µg/mL and pooled to final  
508 concentrations of 10 µg/mL in 50% MeOH. For flow injection analysis the 10 µg/mL  
509 molassamide standard was used and the UHPLC column was bypassed with a stainless  
510 steel union. Continuous injections during the microflow LC gradient were performed  
511 manually through the direct control function in the Xcalibur software (Thermo Scientific)  
512 with ~ 1 min spacing.

513

#### 514 **Chymotrypsin activity assays in native mass spectrometry buffer**

515 Cyanobacteria extract (1 mg/ml, methanol) was diluted in 10 mM ammonium acetate pH  
516 4.5 to 30 µg/mL and then sequentially diluted 1.5-fold to 0.52 µg/mL in the same buffer.  
517 Bovine chymotrypsin (Sigma Aldrich) and Suc-Ala-Ala-Pro-Phe-AMC (Calbiochem,  
518 230914) were diluted to 300 nM and 150 µM, respectively in 10 mM ammonium acetate  
519 pH 4.5. In a 384-well black microplate, 10 µL of enzyme, substrate and cyanobacteria  
520 extract were combined (30 µL final volume) such that the concentrations in the reaction  
521 were 100 nM chymotrypsin, 50 µM of Suc -Ala-Ala-Pro-Phe-AMC and 10 µM to 0.17 nM  
522 of cyanobacteria extract. For solvent compatibility assays, chymotrypsin (100 nM) was  
523 assayed with 10 µg/mL and 1 µg/mL extract in 10 mM ammonium acetate, pH 4.5  
524 containing 8.3 to 41.7% acetonitrile. A control assay lacked acetonitrile and cyanobacteria  
525 extract. All assays were performed in triplicate wells at 25°C in a Synergy HTX Multi-  
526 Mode Microplate Reader (BioTek, Winooski, VT) with excitation and emission  
527 wavelengths of 360 and 460 nm, respectively. The initial reaction velocity in each well  
528 was recorded and the dose response curve was generated using GraphPad Prism 9  
529 software.

530

#### 531 **Calculation of IC<sub>50</sub> values**

532 Chymotrypsin (1 nM), proteinase K (10 nM), and elastase (20 nM) was preincubated with  
533 0 to 3 µM of each compound for 40 min in Dulbecco's phosphate buffered saline, pH 7.4  
534 containing 0.01% Tween-20. The reaction was initiated by addition of 25 µM of Suc-Ala-

535 Ala-Pro-Phe-AMC (Calbiochem, 230914) for proteinase K and chymotrypsin, 25  $\mu$ M of  
536 MeOSuc-Ala-Ala-Pro-Val-AMC (Cayman, 14907) for elastase in a final volume of 30  $\mu$ L,  
537 respectively. The release of the AMC fluorophore was recorded in a Synergy HTX multi-  
538 mode reader (BioTek Instruments, Winooski, VT) with excitation and emission  
539 wavelengths at 340 nm and 460 nm, respectively. The maximum velocity was calculated  
540 in RFU/sec over 10 sequential points on the linear part of the progress curve. The IC<sub>50</sub>  
541 values were determined by nonlinear regression in GraphPad Prism 9.

542

### 543 **NMR spectroscopy**

544 Deuterated NMR solvents were purchased from Cambridge Isotope Laboratories. <sup>1</sup>H  
545 NMR and 2D NMR spectra were collected on a Bruker Avance III DRX-600 NMR with a  
546 1.7 mm dual tune TCI cryoprobe (600 and 150 MHz for <sup>1</sup>H and <sup>13</sup>C NMR, respectively)  
547 and a JEOL ECZ 500 NMR spectrometer equipped with a 3 mm inverse detection probe.  
548 NMR spectra were referenced to residual solvent DMSO signals ( $\delta$ H 2.50 and  $\delta$ C 39.5  
549 as internal standards). The NMR spectra were processed using MestReNova (Mnova  
550 12.0, Mestrelab Research) or TopSpin 3.0 (Bruker Biospin) software.

551

### 552 **Extraction and isolation**

553 The preserved cyanobacterial biomass from collection no. CUR6APR19-1 was filtered  
554 through cheesecloth, and then (98.7 g dry wt) was extracted repeatedly by soaking in 500  
555 mL of 2:1 CH<sub>2</sub>Cl<sub>2</sub>/MeOH with warming (<30 °C) for 30 min to afford 1.44 g of dried extract.  
556 A portion of the extract was fractionated by reverse-phase solid phase extraction (C<sub>18</sub>-  
557 SPE) using a stepwise gradient solvent system of decreasing polarity (Fr. 1-1 35%  
558 ACN/H<sub>2</sub>O, 124.4 mg; Fr. 1-2 70% ACN/H<sub>2</sub>O, 76.1 mg; Fr. 1-3 100% ACN, 77 mg; Fr. 1-4  
559 100% MeOH, 254.9 mg. Fr. 1-2 was dissolved in 70% ACN/H<sub>2</sub>O and purified by  
560 preparative HPLC using a Kinetex 5  $\mu$ m RP 100 Å column (21.00  $\times$  150mm) and isocratic  
561 elution using 50% ACN/H<sub>2</sub>O for 8 minutes then ramping up to 100% in 14 minutes at the  
562 flow rate of 20 mL/min, yielding 56 subfractions. Rivulariapeptolide 1185 (compound **1**)  
563 and 1155 (compound **2**) were isolated from subfractions 1-2-20 to 1-2-23 that were  
564 combined (4.5 mg) and further purified by semi-preparative HPLC using a Synergi 4  $\mu$ m  
565 Hydro-RP 80 Å column (10.00  $\times$  250 mm) and isocratic elution gradient elution using 35%

566 ACN / 65% H<sub>2</sub>O isocratic at the flow rate of 3.5 mL/min for 3 minutes the ramping up to  
567 55% ACN in 22 minutes, then ramping up to 100% ACN in one minute and holding the  
568 gradient at 100% ACN for another 5 minutes yielding **1** (1.6 mg, RT = 23.3 min) and **2**  
569 (1.3 mg, RT = 21.8 min) as a colorless, amorphous solid. The same HPLC conditions were  
570 used to isolate compounds **3** (rivulariapeptolide 1121, from subfraction 1-2-10 and 1-2-  
571 11, 1.1 mg, RT = 18.5 min) and **4** (rivulariapeptolide 988, from subfraction 1-2-7, 1.3 mg,  
572 RT = 12.6 min). Fr. 1-1 was dissolved in 30% ACN/H<sub>2</sub>O and purified by preparative HPLC  
573 using a Kinetex 5  $\mu$ m RP 100 Å column (21.00  $\times$  150 mm) and isocratic elution using 30%  
574 ACN/H<sub>2</sub>O for 10 minutes then ramping up to 50% in 10 minutes and then to 95% in 2 min  
575 at the flow rate of 20 mL/min, yielding 29 subfractions. Molassamide (compound **5**) was  
576 isolated from subfractions 1-1-6 and 2-1-10 were combined (3.3 mg) and further purified  
577 by semi-preparative HPLC using a Synergi 4  $\mu$ m Hydro-RP 80 Å column (10.00  $\times$  250  
578 mm) and isocratic elution gradient elution using 35% ACN / 65% H<sub>2</sub>O isocratic at the flow  
579 rate of 3.5 mL/min for 3 minutes the ramping up to 55% ACN in 22 minutes, then ramping  
580 up to 100% ACN in one minute and holding the gradient at 100% ACN for another 5  
581 minutes yielding **5** as a colorless, amorphous solid (1.8 mg) at RT = 10.8 min. The same  
582 HPLC conditions were used to isolate compound **6** (Molassamide B, from subfraction 1-  
583 1-4 and 1-1-5, 1.8 mg, RT = 13.7 min).

584

585

## 586 **Data Availability**

587 All raw (.raw), deconvoluted (xtract.raw) and centroided (.mzXML or .mzML) mass  
588 spectrometry data as well as processed data feature table (.csv) and MS/MS spectra  
589 (.mgf) are available through the MassIVE repository (massive.ucsd.edu) with the identifier  
590 MSV000087964, MSV000088586 and MSV000088578. The MS/MS spectra of the new  
591 discovered derivatives, including tags as protease inhibitors, have been added to the  
592 GNPS library (gnps.ucsd.edu) with the following IDs: rivulariapeptolide 1185 (**1**):  
593 [CCMSLIB00005723387](https://massive.ucsd.edu/MSV000087964/derivatives/MSV000087964_000001.mgf); rivulariapeptolide 1155 (**2**): [CCMSLIB00005723986](https://massive.ucsd.edu/MSV000087964/derivatives/MSV000087964_000002.mgf),  
594 [CCMSLIB00005720236](https://massive.ucsd.edu/MSV000087964/derivatives/MSV000087964_000003.mgf); rivulariapeptolide 1121 (**3**): [CCMSLIB00005723398](https://massive.ucsd.edu/MSV000087964/derivatives/MSV000087964_000004.mgf);  
595 rivulariapeptolide 988 (**4**): [CCMSLIB00005723393](https://massive.ucsd.edu/MSV000087964/derivatives/MSV000087964_000005.mgf); molassamide (**5**):

596 [CCMSLIB00005723404](https://zenodo.org/record/905199/files/CCMSLIB00005723404); molassamide B (**6**): [CCMSLIB00006710020](https://zenodo.org/record/905199/files/CCMSLIB00006710020). Raw NMR data for  
597 compounds **1 -6** has been deposited to Zenodo (zenodo.org) and can be accessed under  
598 the following link: <https://sandbox.zenodo.org/record/905199>.

599

600

## 601 **Code Availability**

602 The modified version of MZmine2.37 (corr.17.7) used in this study is available at  
603 <https://github.com/robinschmid/mzmine2/releases>. The code for the mass-offset  
604 matching for native metabolomics data analysis is available under  
605 <https://github.com/Functional-Metabolomics-Lab/Native-Metabolomics>.

606

607

## 608 **References**

- 609 1. Newman, D. J. & Cragg, G. M. Natural Products as Sources of New Drugs over the  
610 Nearly Four Decades from 01/1981 to 09/2019. *J. Nat. Prod.* **83**, 770–803 (2020).
- 611 2. Pye, C. R., Bertin, M. J., Lokey, R. S., Gerwick, W. H. & Linington, R. G.  
612 Retrospective analysis of natural products provides insights for future discovery  
613 trends. *PNAS* **114**, 5601–5606 (2017).
- 614 3. Gavriilidou, A. *et al.* A global survey of specialized metabolic diversity encoded in  
615 bacterial genomes. <http://biorxiv.org/lookup/doi/10.1101/2021.08.11.455920> (2021)  
616 doi:10.1101/2021.08.11.455920.
- 617 4. Medema, M. H., de Rond, T. & Moore, B. S. Mining genomes to illuminate the  
618 specialized chemistry of life. *Nat Rev Genet* **22**, 553–571 (2021).
- 619 5. Hooft, J. J. J. van der *et al.* Linking genomics and metabolomics to chart specialized  
620 metabolic diversity. *Chem. Soc. Rev.* **49**, 3297–3314 (2020).
- 621 6. Peisl, B. Y. L., Schymanski, E. L. & Wilmes, P. Dark matter in host-microbiome  
622 metabolomics: Tackling the unknowns—A review. *Analytica Chimica Acta* **1037**, 13–  
623 27 (2018).

- 624 7. Scheubert, K. *et al.* Significance estimation for large scale metabolomics  
625 annotations by spectral matching. *Nat Commun* **8**, 1494 (2017).
- 626 8. Schmid, R. *et al.* Ion identity molecular networking for mass spectrometry-based  
627 metabolomics in the GNPS environment. *Nat Commun* **12**, 3832 (2021).
- 628 9. Dührkop, K. *et al.* Systematic classification of unknown metabolites using high-  
629 resolution fragmentation mass spectra. *Nat Biotechnol* **39**, 462–471 (2021).
- 630 10. Ludwig, M. *et al.* Database-independent molecular formula annotation using Gibbs  
631 sampling through ZODIAC. *Nat Mach Intell* **2**, 629–641 (2020).
- 632 11. Reher, R. *et al.* A Convolutional Neural Network-Based Approach for the Rapid  
633 Annotation of Molecularly Diverse Natural Products. *J. Am. Chem. Soc.* **142**, 4114–  
634 4120 (2020).
- 635 12. Stravs, M. A., Dührkop, K., Böcker, S. & Zamboni, N. *MSNovelist: De novo structure*  
636 *generation from mass spectra*. 2021.07.06.450875  
637 <https://www.biorxiv.org/content/10.1101/2021.07.06.450875v1> (2021)  
638 doi:10.1101/2021.07.06.450875.
- 639 13. Rinschen, M. M., Ivanisevic, J., Giera, M. & Siuzdak, G. Identification of bioactive  
640 metabolites using activity metabolomics. *Nat Rev Mol Cell Biol* **20**, 353–367 (2019).
- 641 14. Yan, M. & Xu, G. Current and future perspectives of functional metabolomics in  
642 disease studies—A review. *Analytica Chimica Acta* **1037**, 41–54 (2018).
- 643 15. Muchiri, R. N. & van Breemen, R. B. Affinity selection—mass spectrometry for the  
644 discovery of pharmacologically active compounds from combinatorial libraries and  
645 natural products. *Journal of Mass Spectrometry* **56**, e4647 (2021).
- 646 16. Liu, J. *et al.* Evaluation of Estrogenic Activity of Plant Extracts for the Potential  
647 Treatment of Menopausal Symptoms. *J. Agric. Food Chem.* **49**, 2472–2479 (2001).
- 648 17. Liu, M., Van Voorhis, W. C. & Quinn, R. J. Development of a target identification  
649 approach using native mass spectrometry. *Sci Rep* **11**, 2387 (2021).
- 650 18. Yen, H.-Y. *et al.* PtdIns(4,5)P<sub>2</sub> stabilizes active states of GPCRs and enhances  
651 selectivity of G-protein coupling. *Nature* **559**, 423–427 (2018).
- 652 19. Yen, H.-Y. *et al.* Ligand binding to a G protein–coupled receptor captured in a mass  
653 spectrometer. *Science Advances* **3**, e1701016 (2017).



- 654 20. Vu, H. *et al.* Plasmodium Gametocyte Inhibition Identified from a Natural-Product-  
655 Based Fragment Library. *ACS Chem. Biol.* **8**, 2654–2659 (2013).
- 656 21. Bolla, J. R., Agasid, M. T., Mehmood, S. & Robinson, C. V. Membrane Protein–Lipid  
657 Interactions Probed Using Mass Spectrometry. *Annu. Rev. Biochem.* **88**, 85–111  
658 (2019).
- 659 22. Gault, J. *et al.* High-resolution mass spectrometry of small molecules bound to  
660 membrane proteins. *Nat Methods* **13**, 333–336 (2016).
- 661 23. Su, H. *et al.* Anti-SARS-CoV-2 activities in vitro of Shuanghuanglian preparations  
662 and bioactive ingredients. *Acta Pharmacol Sin* **41**, 1167–1177 (2020).
- 663 24. Breemen, R. B. van & Choi, Y. Development of a Screening Assay for Ligands to  
664 the Estrogen Receptor Based on Magnetic Microparticles and LC-MS. *Combinatorial  
665 Chemistry & High Throughput Screening* **11**, 1–6.
- 666 25. van Breemen, R. B. *et al.* Pulsed Ultrafiltration Mass Spectrometry: A New Method  
667 for Screening Combinatorial Libraries. *Anal. Chem.* **69**, 2159–2164 (1997).
- 668 26. Kelly, M. A. *et al.* Characterization of SH2–Ligand Interactions via LibraryAffinity  
669 Selection with Mass Spectrometric Detection. *Biochemistry* **35**, 11747–11755  
670 (1996).
- 671 27. Kaur, S., McGuire, L., Tang, D., Dollinger, G. & Huebner, V. Affinity Selection and  
672 Mass Spectrometry-Based Strategies to Identify Lead Compounds in Combinatorial  
673 Libraries. *J Protein Chem* **16**, 505–511 (1997).
- 674 28. Gault, J. *et al.* Combining native and ‘omics’ mass spectrometry to identify  
675 endogenous ligands bound to membrane proteins. *Nat Methods* **17**, 505–508  
676 (2020).
- 677 29. Sumner, L. W. *et al.* Proposed minimum reporting standards for chemical analysis.  
678 *Metabolomics* **3**, 211–221 (2007).
- 679 30. Schymanski, E. L. *et al.* Identifying Small Molecules via High Resolution Mass  
680 Spectrometry: Communicating Confidence. *Environ. Sci. Technol.* **48**, 2097–2098  
681 (2014).
- 682 31. Hong, J. & Luesch, H. Largazole: From discovery to broad-spectrum therapy. *Nat.  
683 Prod. Rep.* **29**, 449–456 (2012).

- 684 32. Gerwick, W. H. *et al.* Structure of Curacin A, a Novel Antimitotic, Antiproliferative  
685 and Brine Shrimp Toxic Natural Product from the Marine Cyanobacterium *Lyngbya*  
686 *majuscula*. *The Journal of Organic Chemistry* **59**, 1243–1245 (1994).
- 687 33. Boudreau, P. D. *et al.* Design of Gallinamide A Analogs as Potent Inhibitors of the  
688 Cysteine Proteases Human Cathepsin L and *Trypanosoma cruzi* Cruzain. *J. Med.*  
689 *Chem.* **62**, 9026–9044 (2019).
- 690 34. Luesch, H., Yoshida, W. Y., Moore, R. E., Paul, V. J. & Corbett, T. H. Total Structure  
691 Determination of Apratoxin A, a Potent Novel Cytotoxin from the Marine  
692 Cyanobacterium *Lyngbya majuscula*. *Journal of the American Chemical Society*  
693 **123**, 5418–5423 (2001).
- 694 35. Köcher, S. *et al.* From dolastatin 13 to cyanopeptolins, micropeptins, and  
695 lyngbyastatins: the chemical biology of Ahp-cyclodepsipeptides. *Nat. Prod. Rep.*  
696 (2019) doi:10.1039/C9NP00033J.
- 697 36. Lodin-Friedman, A. & Carmeli, S. Microginins from a *Microcystis* sp. Bloom Material  
698 Collected from the Kishon Reservoir, Israel. *Marine Drugs* **16**, 78 (2018).
- 699 37. Murakami, M. *et al.* Microviridins, elastase inhibitors from the cyanobacterium  
700 *Nostoc minutum* (NIES-26). *Phytochemistry* **45**, 1197–1202 (1997).
- 701 38. Todorova, A. K., Juettner, F., Linden, A., Pluess, T. & von Philipsborn, W.  
702 Nostocyclamide: A new macrocyclic, thiazole-containing allelochemical from *Nostoc*  
703 sp. 31 (cyanobacteria). *J. Org. Chem.* **60**, 7891–7895 (1995).
- 704 39. Issac, M. *et al.* Cyclotheonellazoles A–C, Potent Protease Inhibitors from the Marine  
705 Sponge *Theonella* aff. *swinhoei*. *J. Nat. Prod.* **80**, 1110–1116 (2017).
- 706 40. Adiv, S. & Carmeli, S. Protease Inhibitors from *Microcystis aeruginosa* Bloom  
707 Material Collected from the Dalton Reservoir, Israel. *J. Nat. Prod.* **76**, 2307–2315  
708 (2013).
- 709 41. Owen, D. R. *et al.* An oral SARS-CoV-2 Mpro inhibitor clinical candidate for the  
710 treatment of COVID-19. *Science* (2021) doi:10.1126/science.abl4784.
- 711 42. Anderson, J., Schiffer, C., Lee, S.-K. & Swanstrom, R. Viral Protease Inhibitors. in  
712 *Antiviral Strategies* (eds. Kräusslich, H.-G. & Bartenschlager, R.) 85–110 (Springer,  
713 2009). doi:10.1007/978-3-540-79086-0\_4.

- 714 43. Ito, S. Proteasome Inhibitors for the Treatment of Multiple Myeloma. *Cancers* **12**,  
715 265 (2020).
- 716 44. Deacon, C. F. A review of dipeptidyl peptidase-4 inhibitors. Hot topics from  
717 randomized controlled trials. *Diabetes, Obesity and Metabolism* **20**, 34–46 (2018).
- 718 45. Messerli, F. H., Bangalore, S., Bavishi, C. & Rimoldi, S. F. Angiotensin-Converting  
719 Enzyme Inhibitors in Hypertension. *Journal of the American College of Cardiology*  
720 **71**, 1474–1482 (2018).
- 721 46. Lee, C. J. & Ansell, J. E. Direct thrombin inhibitors. *British Journal of Clinical*  
722 *Pharmacology* **72**, 581–592 (2011).
- 723 47. Al-Awadhi, F. H. & Luesch, H. Targeting eukaryotic proteases for natural products-  
724 based drug development. *Nat. Prod. Rep.* **37**, 827–860 (2020).
- 725 48. Gunasekera, S. P., Miller, M. W., Kwan, J. C., Luesch, H. & Paul, V. J.  
726 Molassamide, a Depsipeptide Serine Protease Inhibitor from the Marine  
727 Cyanobacterium *Dichothrix utahensis*. *J. Nat. Prod.* **73**, 459–462 (2010).
- 728 49. Miller, B. *et al.* The Marine Cyanobacterial Metabolite Gallinamide A Is a Potent and  
729 Selective Inhibitor of Human Cathepsin L. *Journal of Natural Products* **77**, 92–99  
730 (2014).
- 731 50. Crüseman, M. *et al.* Heterologous Expression, Biosynthetic Studies, and Ecological  
732 Function of the Selective Gq-Signaling Inhibitor FR900359. *Angewandte Chemie*  
733 *International Edition* **57**, 836–840 (2018).
- 734 51. H. Medema, M. The year 2020 in natural product bioinformatics: an overview of the  
735 latest tools and databases. *Natural Product Reports* **38**, 301–306 (2021).
- 736 52. Nogle, L. M., Williamson, R. T. & Gerwick, W. H. Somamides A and B, Two New  
737 Depsipeptide Analogues of Dolastatin 13 from a Fijian Cyanobacterial Assemblage  
738 of *Lyngbya majuscula* and *Schizothrix* Species. *J. Nat. Prod.* **64**, 716–719 (2001).
- 739 53. Al-Awadhi, F. H., Paul, V. J. & Luesch, H. Structural Diversity and Anticancer  
740 Activity of Marine-Derived Elastase Inhibitors: Key Features and Mechanisms  
741 Mediating the Antimetastatic Effects in Invasive Breast Cancer. *ChemBioChem* **19**,  
742 815–825 (2018).

- 743 54. Taori, K., Matthew, S., Rocca, J. R., Paul, V. J. & Luesch, H. Lyngbyastatins 5–7,  
744 Potent Elastase Inhibitors from Floridian Marine Cyanobacteria, *Lyngbya* spp. *J.*  
745 *Nat. Prod.* **70**, 1593–1600 (2007).
- 746 55. Iwasaki, A., Sumimoto, S., Ohno, O., Suda, S. & Suenaga, K. Kurahamide, a Cyclic  
747 Depsipeptide Analog of Dolastatin 13 from a Marine Cyanobacterial Assemblage of  
748 *Lyngbya* sp. *BCSJ* **87**, 609–613 (2014).
- 749 56. Dührkop, K. *et al.* SIRIUS 4: a rapid tool for turning tandem mass spectra into  
750 metabolite structure information. *Nat Methods* **16**, 299–302 (2019).
- 751 57. Ludwig, M. *et al.* Database-independent molecular formula annotation using Gibbs  
752 sampling through ZODIAC. *Nat Mach Intell* **2**, 629–641 (2020).
- 753 58. Sahebnaasagh, A. *et al.* Neutrophil elastase inhibitor (sivelestat) may be a promising  
754 therapeutic option for management of acute lung injury/acute respiratory distress  
755 syndrome or disseminated intravascular coagulation in COVID-19. *J Clin Pharm*  
756 *Ther* **45**, 1515–1519 (2020).
- 757 59. Sweeney, P. J. & Walker, J. M. Proteinase K (EC 3.4.21.14). in *Enzymes of*  
758 *Molecular Biology* (ed. Burrell, M. M.) 305–311 (Humana Press, 1993).  
759 doi:10.1385/0-89603-234-5:305.
- 760 60. Gao, B.-J., Mou, Y.-N., Tong, S.-M., Ying, S.-H. & Feng, M.-G. Subtilisin-like Pr1  
761 proteases marking the evolution of pathogenicity in a wide-spectrum insect-  
762 pathogenic fungus. *Virulence* **11**, 365–380 (2020).
- 763 61. O'Donoghue, A. J. *et al.* Destructin-1 is a collagen-degrading endopeptidase  
764 secreted by *Pseudogymnoascus destructans*, the causative agent of white-nose  
765 syndrome. *Proc Natl Acad Sci U S A* **112**, 7478–7483 (2015).
- 766 62. Salvador, L. A. *et al.* Potent Elastase Inhibitors from Cyanobacteria: Structural Basis  
767 and Mechanisms Mediating Cytoprotective and Anti-Inflammatory Effects in  
768 Bronchial Epithelial Cells. *J. Med. Chem.* **56**, 1276–1290 (2013).
- 769 63. Keller, L. *et al.* Tutuilamides A–C: Vinyl-Chloride-Containing Cyclodepsipeptides  
770 from Marine Cyanobacteria with Potent Elastase Inhibitory Properties. *ACS Chem.*  
771 *Biol.* **15**, 751–757 (2020).
- 772 64. The diverse and expanding role of mass spectrometry in structural and molecular  
773 biology. *The EMBO Journal* **35**, 2634–2657 (2016).

- 774 65. Wörner, T. P. *et al.* Resolving heterogeneous macromolecular assemblies by  
775 Orbitrap-based single-particle charge detection mass spectrometry. *Nat Methods*  
776 **17**, 395–398 (2020).
- 777 66. Webb, I. K. Recent technological developments for native mass spectrometry.  
778 *Biochimica et Biophysica Acta (BBA) - Proteins and Proteomics* **1870**, 140732  
779 (2022).
- 780 67. Leney, A. C. & Heck, A. J. R. Native Mass Spectrometry: What is in the Name? *J.*  
781 *Am. Soc. Mass Spectrom.* **28**, 5–13 (2017).
- 782 68. Baunach, M., Chowdhury, S., Stallforth, P. & Dittmann, E. The Landscape of  
783 Recombination Events That Create Nonribosomal Peptide Diversity. *Molecular*  
784 *Biology and Evolution* **38**, 2116–2130 (2021).

785

786

## 787 **Acknowledgment**

788 We thank the Deutsche Forschungsgemeinschaft for the support of D.P. through a  
789 postdoctoral research fellowship (PE 2600/1-1) and of D.P. and C.C.H. through the CMFI  
790 Cluster of Excellence (EXC 2124). R.R., P.C.D., and W.H.G. were supported by the  
791 Gordon and Betty Moore Foundation (GBMF7622) and by the US National Institutes of  
792 Health (R01 GM107550, P41 GM103484 and R03 CA211211). WB was supported in part  
793 by the Research Foundation – Flanders (12W0418N).

794

795

## 796 **Author information**

### 797 **Affiliations**

798 **Scripps Institution of Oceanography, University of California San Diego, USA**

799 Raphael Reher, Kelsey L Alexander, William H Gerwick, Daniel Petras

800

801

802

803 **Skaggs School of Pharmacy and Pharmaceutical Science, University of California**  
804 **San Diego, USA**

805 Allegra T Aron, Pavla Fajtova, Chenxi Liu, Ido Y Ben Shalom, Wout Bittremieux,  
806 Mingxun Wang, Pieter C Dorrestein, Anthony J O'Donoghue, William H Gerwick, Daniel  
807 Petras

808  
809 **Institute of Pharmacy, Martin-Luther-University Halle-Wittenberg, Halle (Saale),**  
810 **Germany**

811 Raphael Reher

812  
813 **Department of Pharmaceutical Sciences, School of Pharmacy, University of**  
814 **Puerto Rico - Medical Sciences Campus, San Juan, Puerto Rico**

815 Marie L Matos-Hernandez, Eduardo J Caro-Diaz

816  
817 **Li Dak Sum Yip Yio Chin Kenneth Li Marine Biopharmaceutical Research Center,**  
818 **Department of Marine Pharmacy, College of Food and Pharmaceutical Sciences,**  
819 **Ningbo University 315832, Ningbo, China**

820 C Benjamin Naman

821  
822 **Department of Chemistry and Biochemistry, University of California San Diego,**  
823 **USA**

824 Kelsey L Alexander

825  
826 **CMFI Cluster of Excellence, Interfaculty Institute of Microbiology and Infection**  
827 **Medicine, University of Tuebingen, Germany**

828 Paolo Stincone, Chambers C. Hughes, Daniel Petras

829  
830 **Department of Microbial Bioactive Compounds, Interfaculty Institute for**  
831 **Microbiology and Infection Medicine, University of Tuebingen, Germany**

832 Chambers C. Hughes

833

834

835 **German Center for Infection Research, Partner Site Tuebingen, Germany**

836 Chambers C. Hughes

837

### 838 **Contributions**

839 R.R., W.H.G. and D.P. conceived the study. R.R., K.L.A., C.B.N., E.J.C., and W.H.G.  
840 collected and extracted environmental samples. A.T.A., and D.P. developed the native  
841 metabolomics approach. W.B. wrote software code. M.W. aided in integration with GNPS  
842 tags. R.R., A.T.A., P.S., and D.P. performed MS experiments. R.R. and M.L.M. performed  
843 compound isolation. R.R. carried out NMR experiments. R.R., P.S., C.C.H., and D.P.  
844 performed total hydrolysis and derivatization experiments. P.F., C.L., and A.J.O.  
845 performed activity assays. I.B.S. performed docking studies. R.R., and D.P. wrote the  
846 manuscript. All authors edited and approved the final manuscript.

847

### 848 **Corresponding authors**

849 Correspondence should be addressed to Daniel Petras ([daniel.petras@uni-](mailto:daniel.petras@uni-tuebingen.de)  
850 [tuebingen.de](mailto:daniel.petras@uni-tuebingen.de)) for questions regarding native metabolomics and MS-based structure  
851 elucidation, and to William Gerwick ([wgerwick@health.ucsd.edu](mailto:wgerwick@health.ucsd.edu)) for question regarding  
852 cyanobacteria sampling and NMR-based structure elucidation.

853

### 854 **Ethics declarations**

### 855 **Competing interests**

856 P.C.D. and W.H.G. are scientific advisors of Sirenas. P.C.D. is a scientific advisor of  
857 Galileo, Cybele, and scientific advisor and co-founder of Ometa Labs LLC and Enveda  
858 with approval by the UC San Diego. M.W. is a founder of Ometa Labs LLC.

859

### 860 **Supplementary information**

861 **Supplementary Results, Methods, Figures, and NMR tables.**

862

863
